# Supplementary material for: Mitochondria-localized dinuclear iridium(iii) complexes for two-photon photodynamic therapy
Source: Royal Society of Chemistry journal article supplement (doi:10.1039/d4dt03426k), 2025-01-01
Supplement: d4dt03426k1.pdf [file d4dt03426k1.pdf]

Supporting Information

**Mitochondria-localized dinuclear iridium(III) complexes for  
two-photon photodynamic therapy**

**Zanru Tan,<sup>a</sup> Jiang Feng,<sup>b</sup> Jiangping Liu,<sup>\*c</sup> Taihong Liu,<sup>\*b</sup>  
Huihui Wu,<sup>\*d</sup> and Hui Chao<sup>\*a</sup>**

<sup>a</sup> *MOE Key Laboratory of Bioinorganic and Synthetic Chemistry, Guangdong Basic Research Center of Excellence for Functional Molecular Engineering, School of Chemistry, Sun Yat-Sen University, Guangzhou, 510275, P. R. China. Email: ceschh@mail.sysu.edu.cn*

<sup>b</sup> *Key Laboratory of Applied Surface and Colloid Chemistry of Ministry of Education, School of Chemistry and Chemical Engineering, Shaanxi Normal University, Xi'an, Shaanxi 710119, P. R. China. E-mail: liuth121@snnu.edu.cn*

<sup>c</sup> *The Institute of Flexible Electronics (IFE, Future Technologies), Xiamen University, Xiamen, 361102, P. R. China. Email: liujping@xmu.edu.cn*

<sup>d</sup> *Department of Dermatology, The East Division of the First Affiliated Hospital, Sun Yat-Sen University, Guangzhou, 510700, P. R. China. E-mail: cometvivi@126.com*

# Table of Contents

|                                                                                                |    |
|------------------------------------------------------------------------------------------------|----|
| <b>Fig. S1</b> Synthetic route of the Ir(III) complexes.....                                   | 2  |
| <b>Fig. S2</b> Size distribution of (a) N-Ir1, (b) N-Ir2, (c) N-Ir3.....                       | 3  |
| <b>Fig. S3</b> Long-term stability evaluation for different nanoparticles. ....                | 4  |
| <b>Fig. S4</b> Zeta potentials of N-Ir1-4 in physiological pH aqueous solution.....            | 5  |
| <b>Fig. S5</b> UV-Vis spectra of the N-Ir1-4 in PBS for 48 h.....                              | 6  |
| <b>Fig. S6</b> Two-photon absorption cross section of Ir1-4 .....                              | 7  |
| <b>Fig. S7</b> ESR spectra of Ir1-4.....                                                       | 8  |
| <b>Fig. S8</b> Plots of the cumulative decrease of ABDA .....                                  | 9  |
| <b>Fig. S9</b> Partition coefficient (log Po/w) of the indicated complexes.....                | 10 |
| <b>Fig. S10</b> Time-dependent ICP-MS of A375 cells pre-incubated with Ir1-4 and N-Ir1-4 ..... | 11 |
| <b>Fig. S11</b> MS spectrum of the ligand tbpip-NO <sub>2</sub> .....                          | 12 |
| <b>Fig. S12</b> MS spectrum of the ligand tbpip-NH <sub>2</sub> .....                          | 13 |
| <b>Fig. S13</b> MS spectrum of Ir-tbpip-NH <sub>2</sub> .....                                  | 14 |
| <b>Fig. S14</b> MS spectrum of Ir1 .....                                                       | 15 |
| <b>Fig. S15</b> <sup>1</sup> H NMR spectrum of Ir1 .....                                       | 16 |
| <b>Fig. S16</b> MS spectrum of Ir2 .....                                                       | 17 |
| <b>Fig. S17</b> <sup>1</sup> H NMR spectrum of Ir2 .....                                       | 18 |
| <b>Fig. S18</b> MS spectrum of Ir3 .....                                                       | 19 |
| <b>Fig. S19</b> <sup>1</sup> H NMR spectrum of Ir3 .....                                       | 20 |
| <b>Fig. S20</b> MS spectrum of Ir4 .....                                                       | 21 |
| <b>Fig. S21</b> <sup>1</sup> H NMR spectrum of Ir4.....                                        | 22 |
| <b>Table S1</b> Photophysical properties.....                                                  | 23 |
| <b>Table S2.</b> 2PA cross sections of Ir1-4 with different excitation wavelengths. ....       | 24 |
| <b>Table S3</b> Single oxygen quantum yields.....                                              | 25 |

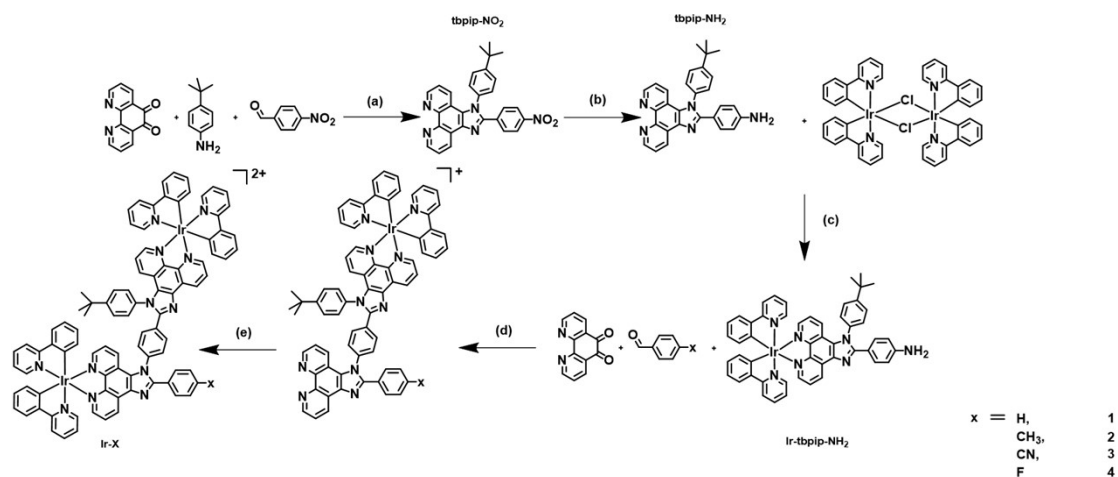

**Fig. S1** Synthetic route of the **Ir(III)** complexes. (a) NH<sub>4</sub>OAc, HOAc, 120 °C, 12 h; (b) Pd/C, EtOH, H<sub>2</sub>O<sub>2</sub>, 65°C, 12 h; (c) DCM/MeOH(1:1, v/v), Ar, 85 °C, 6 h; (d) NH<sub>4</sub>OAc, HOAc, 135 °C, 12 h; (e) DCM/MeOH(1:1, v/v), Ar, 85 °C, 6 h.

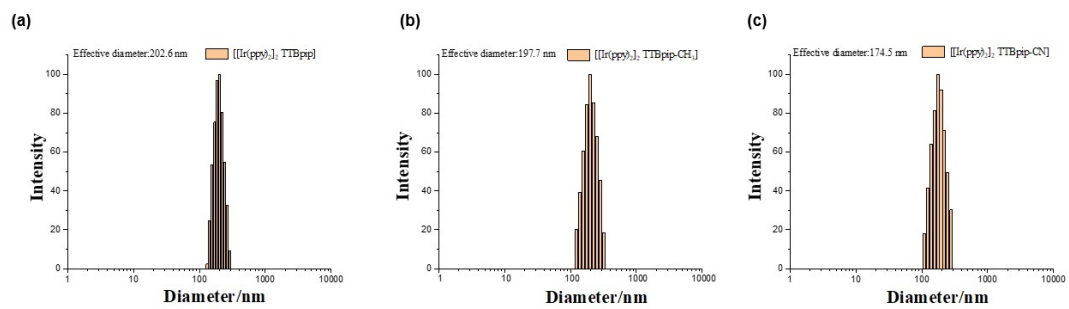

**Fig. S2** Size distribution of (a) N-Ir1, (b) N-Ir2, (c) N-Ir3 determined by dynamic light scattering.

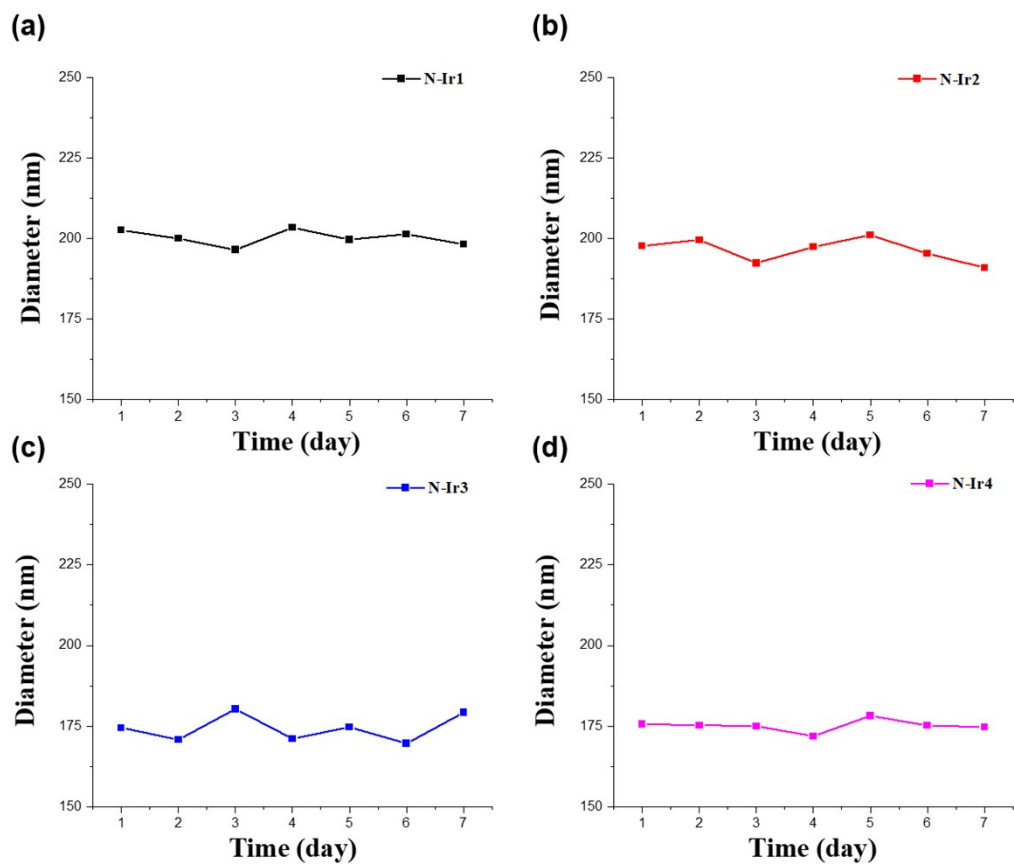

**Fig. S3** Long-term stability evaluation for different nanoparticles. (a) N-Ir1, (b) N-Ir2, (c) N-Ir3, (d) N-Ir4.

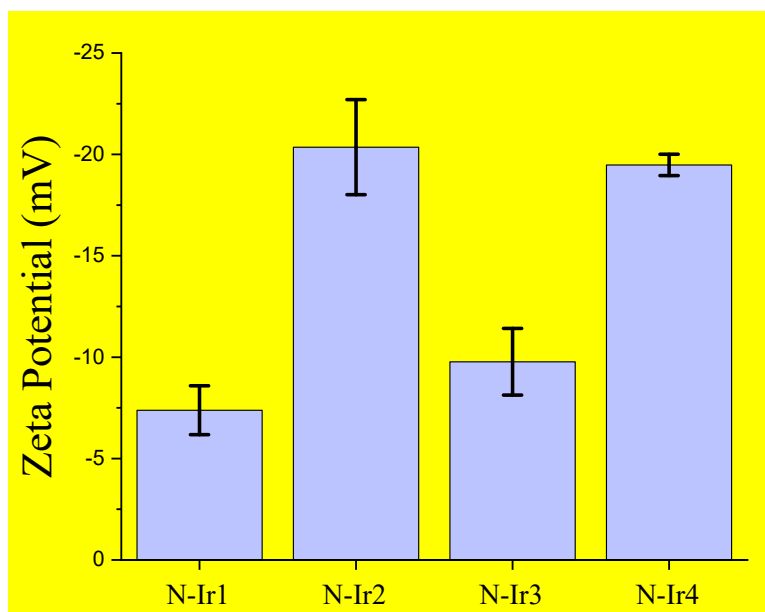

**Fig. S4 Zeta potentials of N-Ir1-4 in physiological pH aqueous solution.**

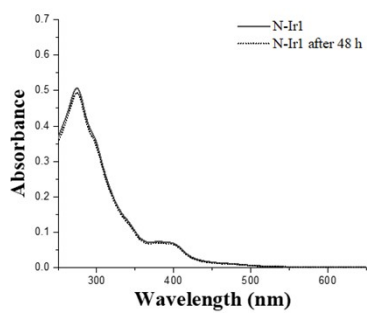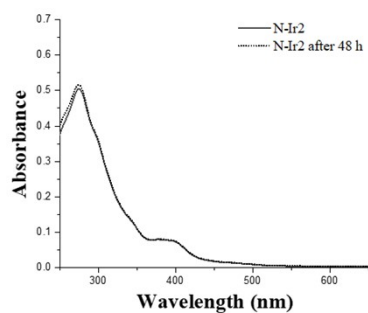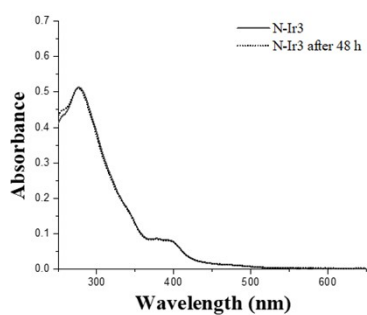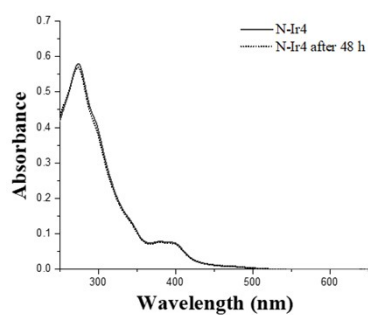

**Fig. S5 UV-Vis spectra of the N-Ir1-4 in PBS for 48 h.**

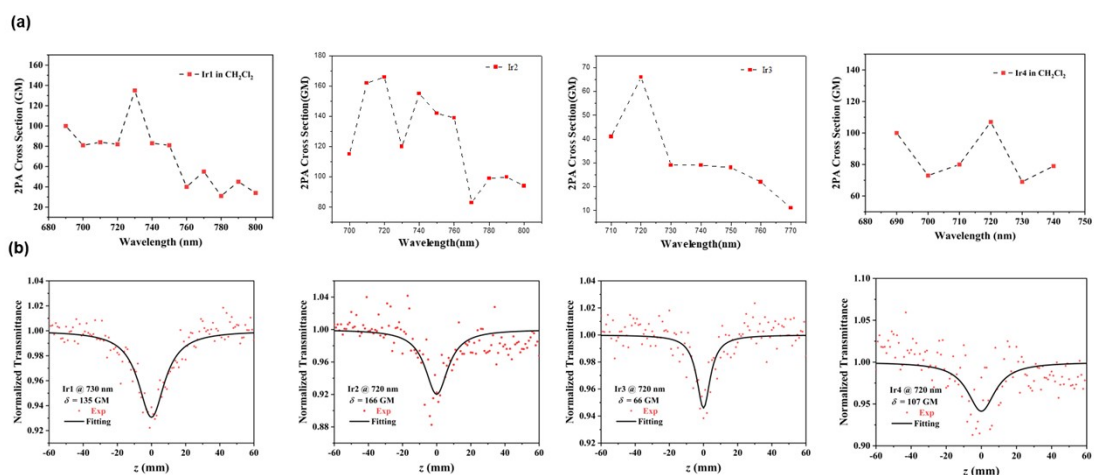

**Fig. S6** (a) Two-photon absorption cross section of **Ir1-4** in dichloromethane ( $c \sim 1.0 \times 10^{-2}$  M). (b) OA Z-scan data of **Ir1-4**. Open scattered symbols represent experimental data and solid lines are fits resulting from 2PA, The solid lines represent the fits for 2PA.



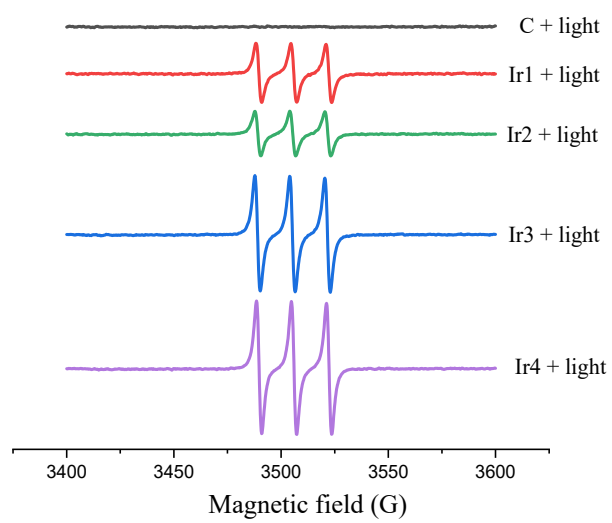

**Fig. S7** ESR spectra of **Ir1-4** in the presence of TEMP.

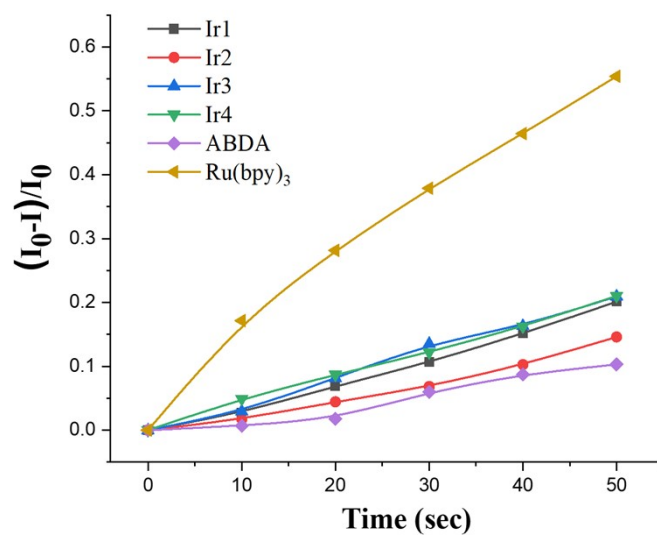

**Fig. S8** Plots of the cumulative decrease in optical density of ABDA (100  $\mu$ M) at 378 nm along irradiation time ( $\lambda_{\text{irr}}=405$  nm) in the presence of the indicated complexes.  $[\text{Ru}(\text{bpy})_3]^{2+}$  as the standard.

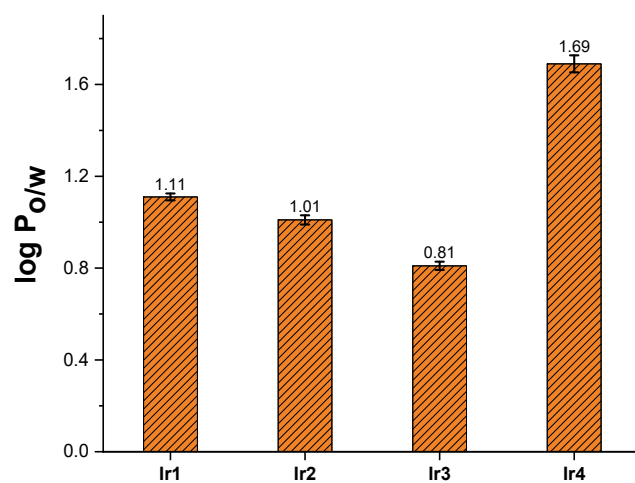

**Fig. S9** Partition coefficient ( $\log P_{o/w}$ ) of the indicated complexes. All the experiments were performed as duplicates of triplicates ( $n = 3$  independent experiments). The error bars represent the standard deviation (SD).

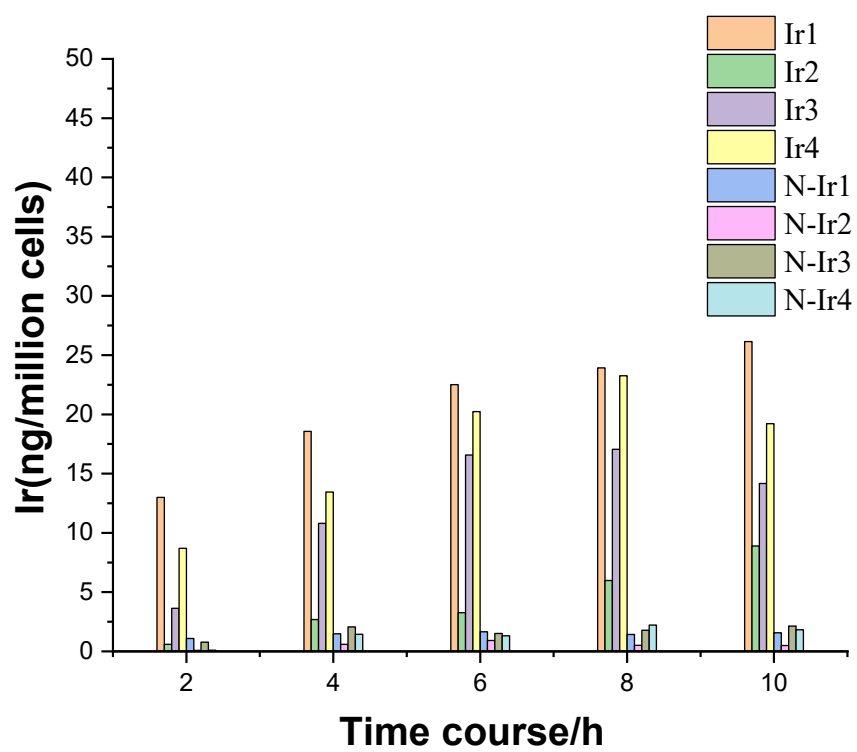

**Fig. S10** Time-dependent ICP-MS of A375 cells pre-incubated with **Ir1-4** and **N-Ir1-4** (4  $\mu$ M).

20241129\_241202090227 #1500 RT: 3.37 AV: 1 SB: 217 2.24-2.72 NL: 1.39E7  
T: FTMS + c ESI Full ms [50.00-1000.00]

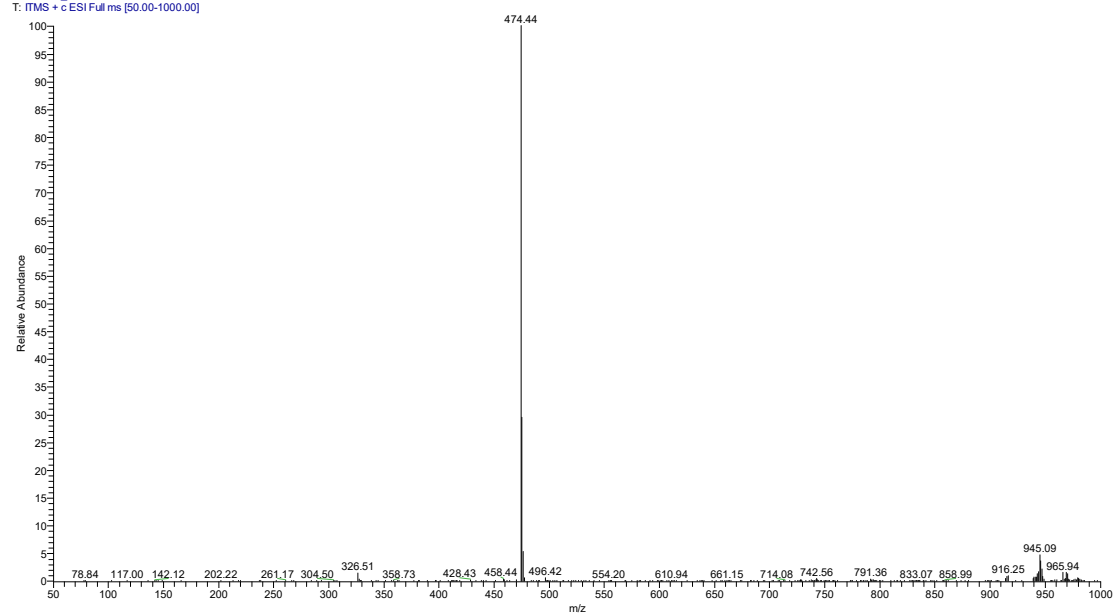

**Fig. S11** MS spectrum of the ligand  $\text{tbpip-NO}_2$

20241129\_241202090227#1000 RT: 2.25 AV: 1 SB: 49 0.29-0.40 NL: 1.60E7  
T: FTMS + c ESI Full ms [50.00-1000.00]

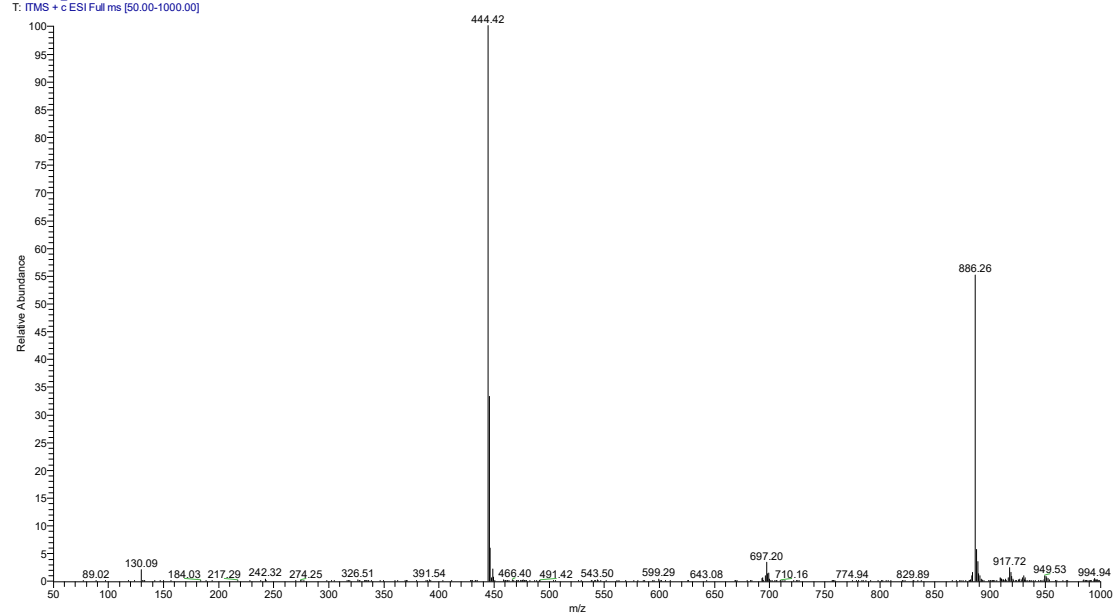

**Fig. S12** MS spectrum of the ligand  $\text{tbpip-NH}_2$

111111\_241206182642 #167 RT: 0.54 AV: 1 SB: 40 0.29-0.42 NL: 4.33E6  
T: FTMS + c ESI Full ms [100.00-2000.00]

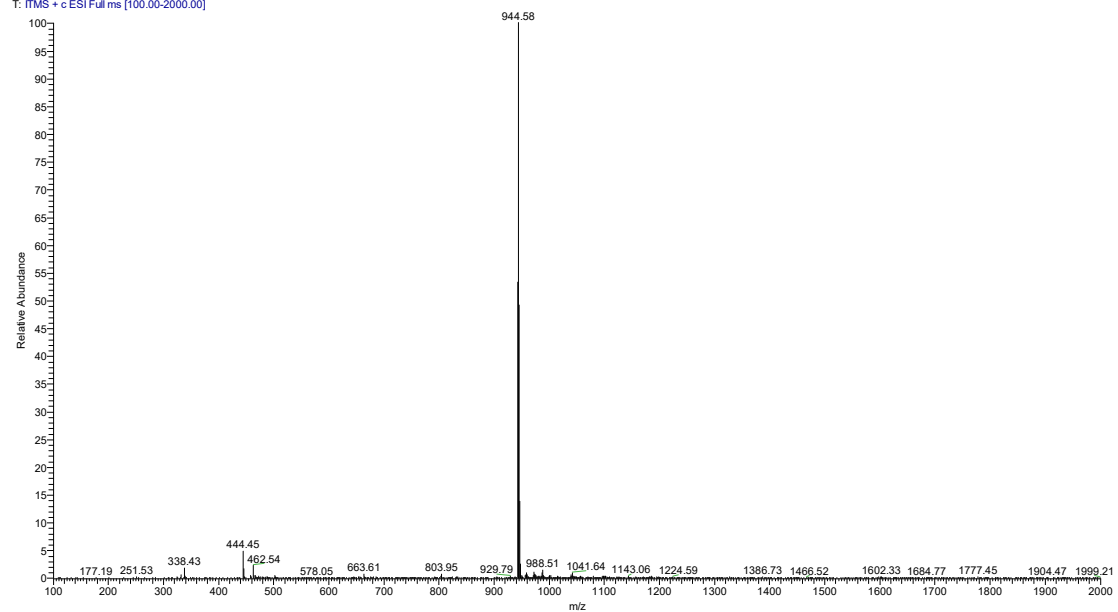

**Fig. S13** MS spectrum of Ir-tbpip-NH<sub>2</sub>

20241017-HPC\_241018091155#1205 RT: 3.95 AV: 1 SB: 71 2.77-2.99 NL: 6.85E6  
T: FTMS + c ESI Full ms [50.00-2000.00]

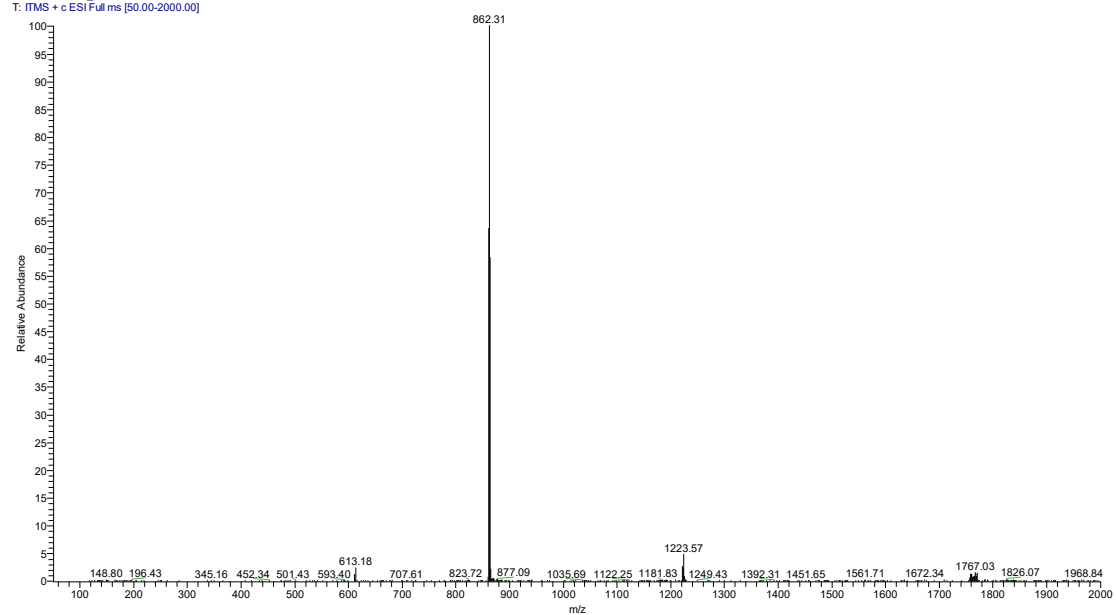

**Fig. S14** MS spectrum of Ir1



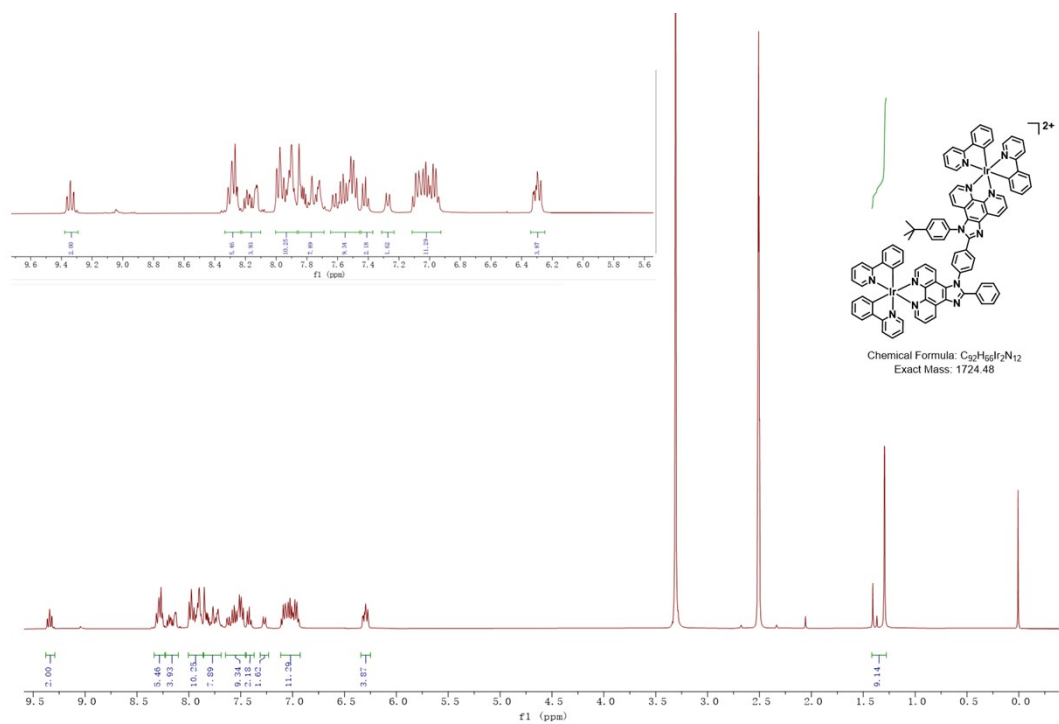

**Fig. S15** <sup>1</sup>H NMR spectrum of Ir1

20241017-HPC\_241018091155#1876 RT: 6.17 AV: 1 SB: 71 2.77-2.99 NL: 1.63E7  
T: FTMS + c ESI Full ms [50.00-2000.00]

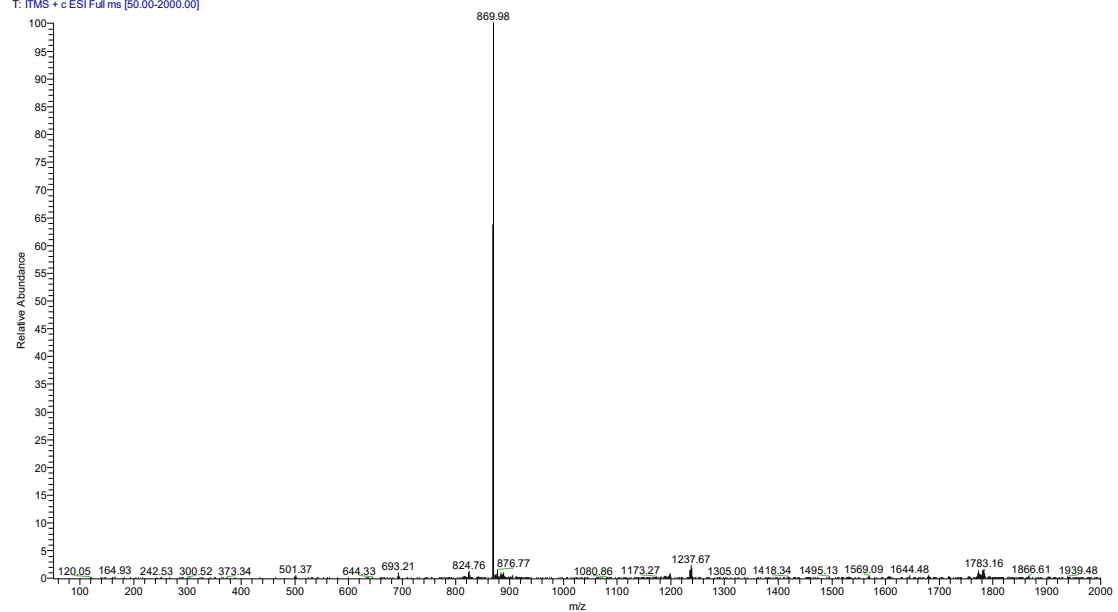

**Fig. S16** MS spectrum of Ir2

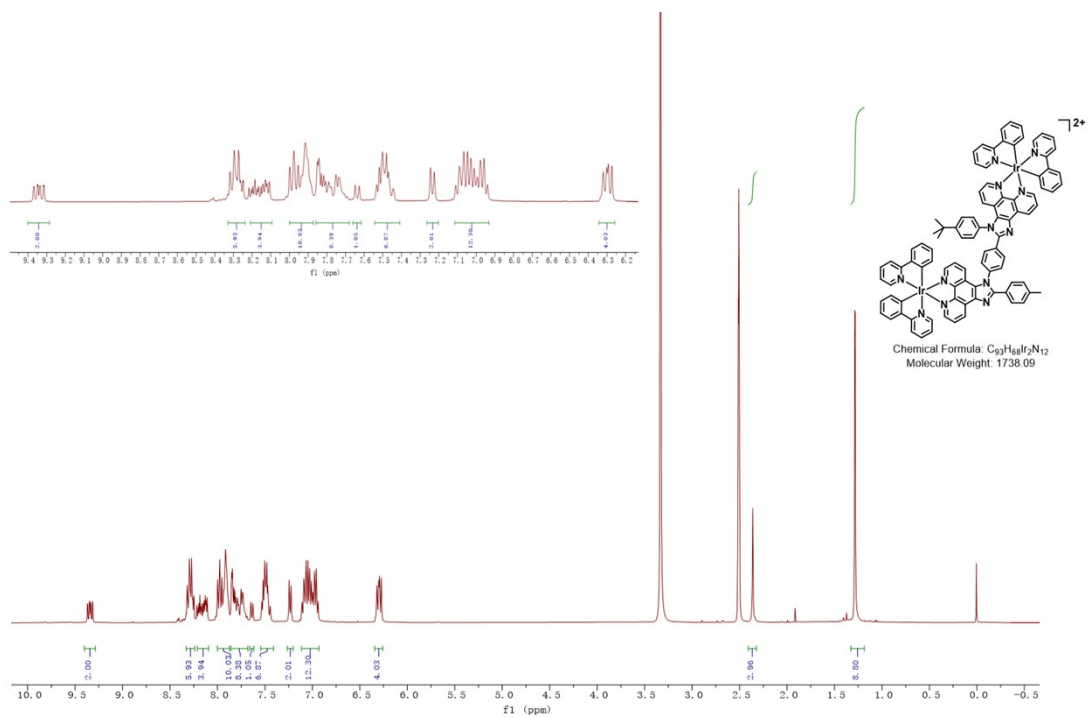

**Fig. S17**  $^1\text{H}$  NMR spectrum of Ir2

20241017-HPC\_241018091155#3111 RT: 10.23 AV: 1 SB: 71 2.77-2.99 NL: 1.27E7  
T: FTMS + c ESI Full ms [50.00-2000.00]

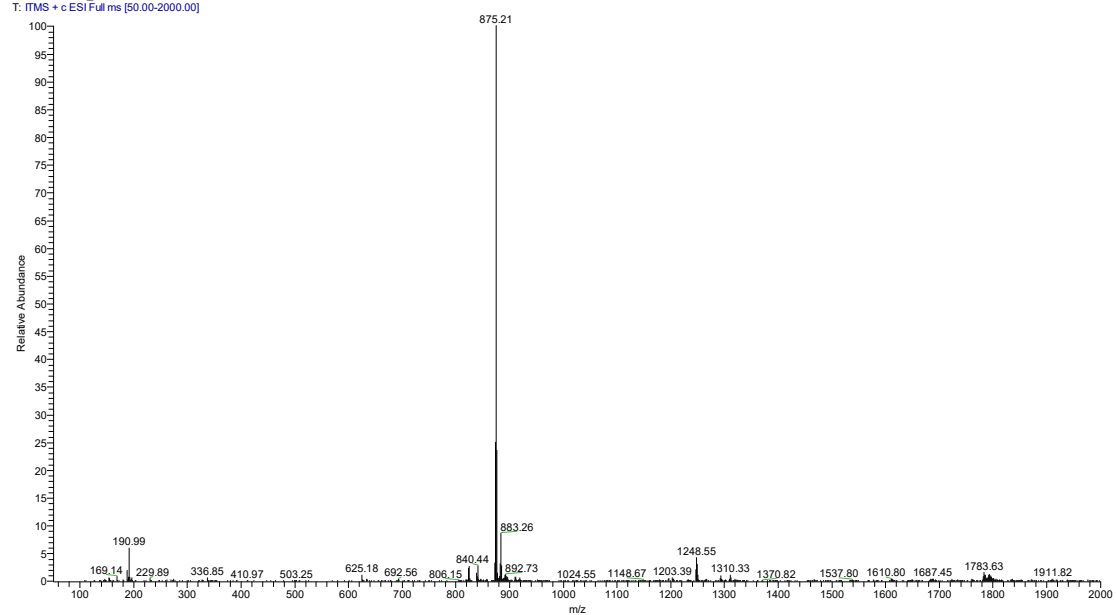

**Fig. S18** MS spectrum of Ir<sub>3</sub>

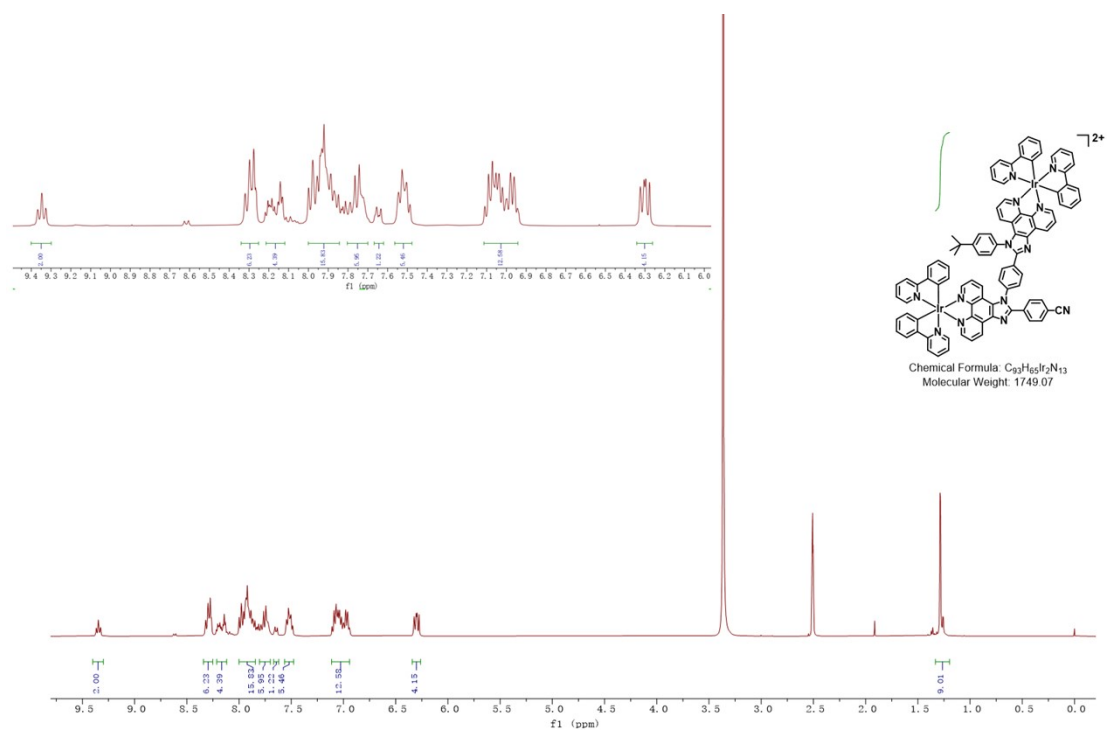

**Fig. S19**  $^1H$  NMR spectrum of Ir3

20241017-HPC\_241018091155 #2318 RT: 7.63 AV: 1 SB: 71 2.77-2.99 NL: 5.99E7  
T: FTMS + c ESI Full ms [50.00-2000.00]

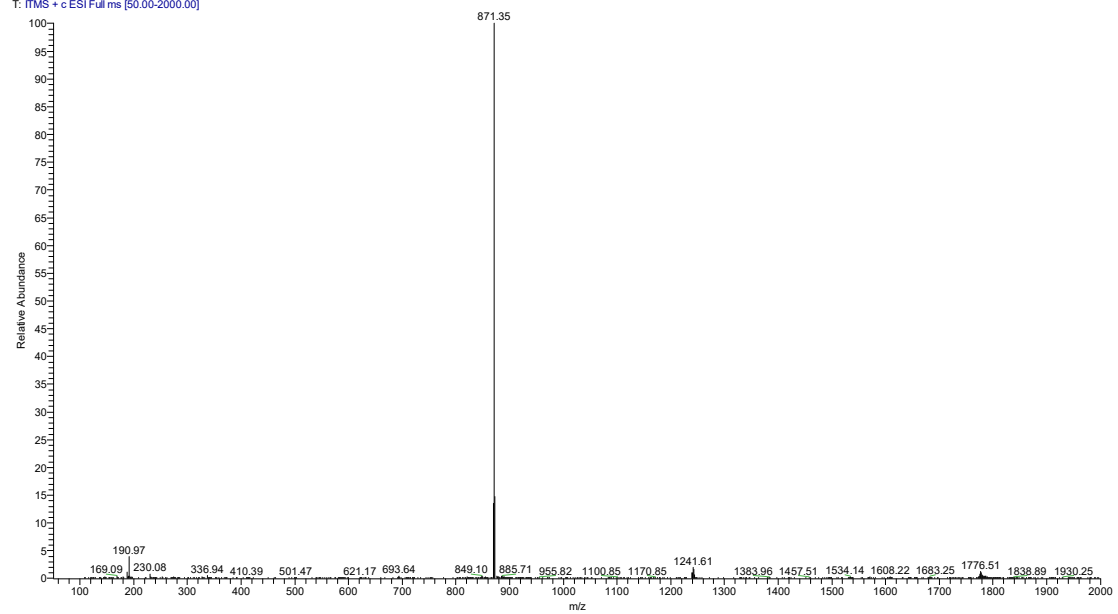

**Fig. S20** MS spectrum of Ir4

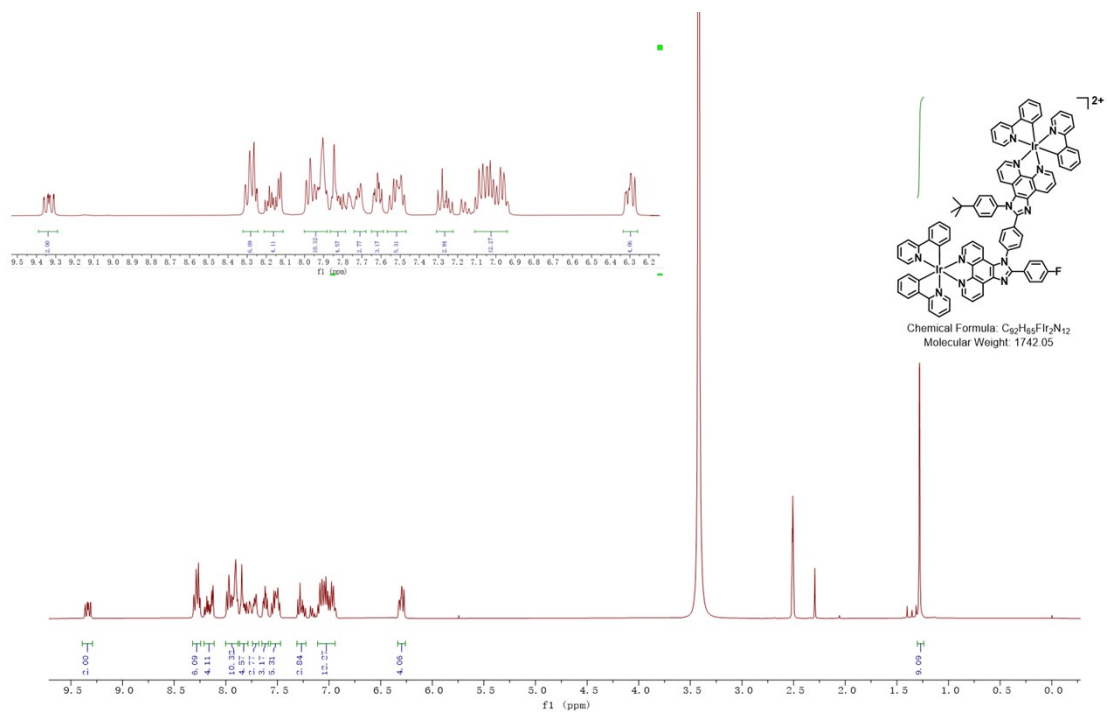

**Fig. S21**  $^1H$  NMR spectrum of Ir4

**Table S1 Photophysical properties of designed compounds**

| Compd      | $\lambda_{\text{abs}}/\text{nm}$ ( $\epsilon, \times 10^3 \text{ M}^{-1} \cdot \text{cm}^{-1}$ ) | $\lambda_{\text{em}}/\text{nm}$ | $\Phi_{\text{u}}(\text{air})$ | $\tau/\text{ns}$ |
|------------|--------------------------------------------------------------------------------------------------|---------------------------------|-------------------------------|------------------|
| <b>Ir1</b> | 275, 385, 404                                                                                    | 568                             | 0.0198                        | 203              |
| <b>Ir2</b> | 274, 385, 404                                                                                    | 569                             | 0.0182                        | 201              |
| <b>Ir3</b> | 275, 383, 401                                                                                    | 570                             | 0.0187                        | 201              |
| <b>Ir4</b> | 273, 385, 403                                                                                    | 570                             | 0.0193                        | 200              |



| <b>Wavelength/nm</b>                    | 690 | 700 | 710 | 720 | 730 | 740 | 750 | 760 | 770 | 780 | 790 | 800 |
|-----------------------------------------|-----|-----|-----|-----|-----|-----|-----|-----|-----|-----|-----|-----|
| <b>Ir1 <math>\delta_{2PA}/GM</math></b> | 100 | 81  | 84  | 82  | 135 | 83  | 81  | 40  | 55  | 31  | 45  | 34  |
| <b>Ir2 <math>\delta_{2PA}/GM</math></b> | --  | 115 | 162 | 166 | 120 | 155 | 142 | 139 | 83  | 99  | 100 | 94  |
| <b>Ir3 <math>\delta_{2PA}/GM</math></b> | --  | --  | 41  | 66  | 29  | 29  | 28  | 22  | 11  | --  | --  | --  |
| <b>Ir4 <math>\delta_{2PA}/GM</math></b> | 100 | 73  | 80  | 107 | 69  | 79  | --  | --  | --  | --  | --  | --  |

**Table S2. 2PA cross sections of Ir1-4 with different excitation wavelengths.**

**Table S3 Single oxygen quantum yields of complexes.**

| Compd           | <b>Ru(bpy)<sub>3</sub><sup>2+</sup></b> | <b>Ir1</b> | <b>Ir2</b> | <b>Ir3</b> | <b>Ir4</b> |
|-----------------|-----------------------------------------|------------|------------|------------|------------|
| $\Phi_{\Delta}$ | 0.81                                    | 0.31       | 0.22       | 0.32       | 0.31       |
